# Supplementary figures and images for: Chromosomal Distribution of PcG Proteins during Drosophila Development
Source: PLOS journal article supplement (doi:10.1371/journal.pbio.0040170), 2006-04-20

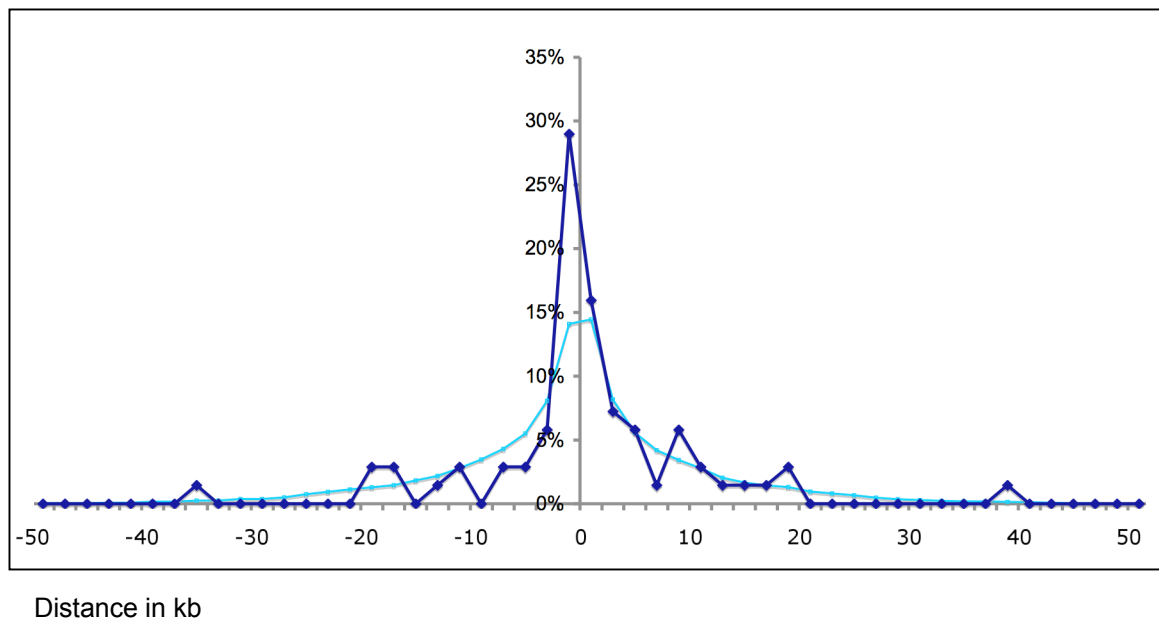

**Figure S4**

Supplement: S4 (10.1371/journal.pbio.0040170.s004) [file journal.pbio.0040170.s004]
